# Supplementary material for: Epigenomic diversity of cortical projection neurons in the mouse brain
Source: PubMed Central journal article supplement (PMC8494636; doi:10.1038/s41586-021-03223-w), 2021-10-06

**Supplementary information**

---

**Epigenomic diversity of cortical projection neurons in the mouse brain**

---

In the format provided by the authors and unedited

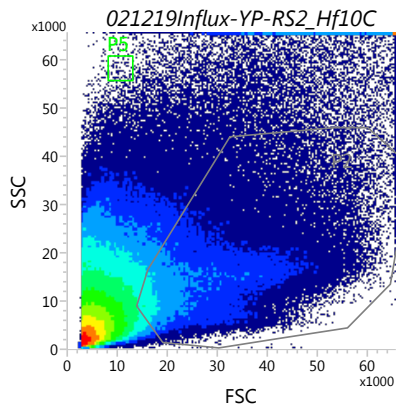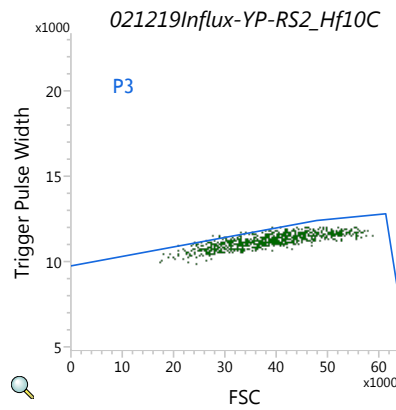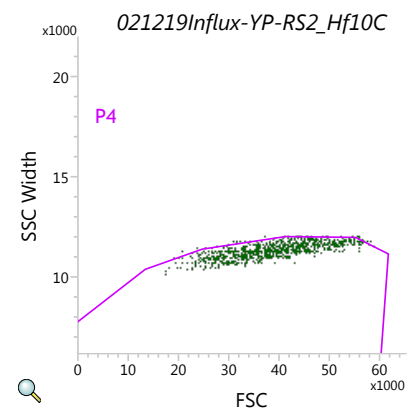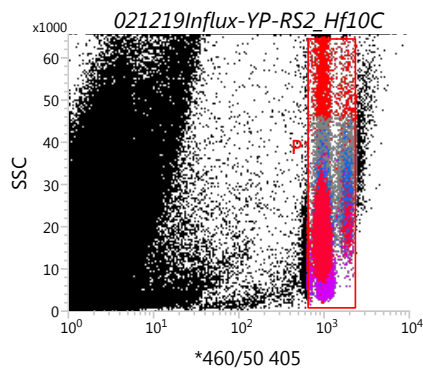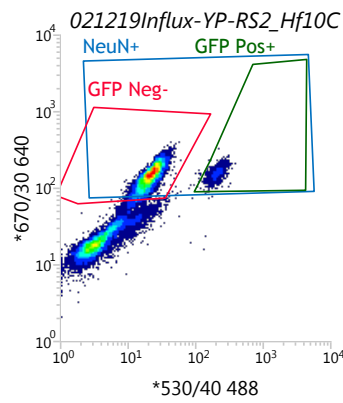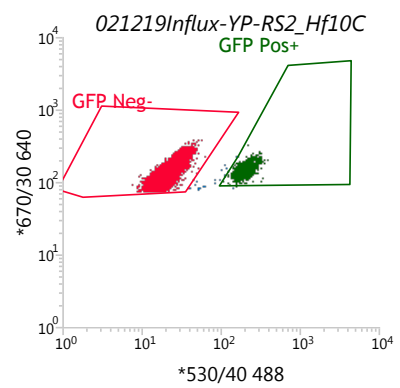

Statistics: 021219Influx-YP-RS2\_Hf10C

| Populations | Events  | % Total | % Parent |
|-------------|---------|---------|----------|
| All Events  | 668,081 | 100.00% | ####     |
| P1          | 61,375  | 9.19%   | 9.19%    |
| P2          | 58,027  | 8.69%   | 94.55%   |
| P3          | 46,765  | 7.00%   | 80.59%   |
| P4          | 42,792  | 6.41%   | 91.50%   |
| NeuN+       | 24,181  | 3.62%   | 56.51%   |
| GFP Pos+    | 894     | 0.13%   | 3.70%    |
| GFP Neg-    | 23,266  | 3.48%   | 96.22%   |

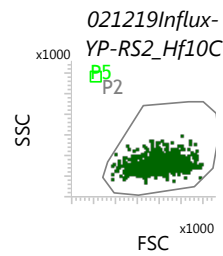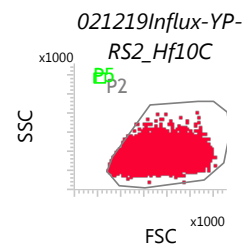

Supplement: 41586_2021_3223_MOESM1_ESM.pdf [file 41586_2021_3223_MOESM1_ESM.pdf]
